# Supplementary material for: Mineral wealth paradox: health challenges and environmental risks in African resource-rich areas
Source: Springer Nature journal article supplement (doi:10.1186/s12889-024-18137-1), 2024-03-06
Supplement: MOESM1 [file 26826072]

1 Mineral Wealth Paradox: Health Challenges and  
2 Environmental Risks in African Resource-Rich Areas

3 Online Appendix

4 Emmanuel Adu Sarfo<sup>1, 2</sup> and Rabbi Tweneboah<sup>1\*</sup>

5 <sup>1</sup>Faculty of Economic Sciences, National Research University, Higher School of  
6 Economics, 20 Myasnitskaya Street, 101000, Moscow, Russia.

7 <sup>2</sup>Department of Mathematics and Statistics, Youngstown State University, 1 University  
8 Plaza, OH 44555, Ohio, United States.

9 \*Corresponding author(s). E-mail(s): [rtveneboakh@edu.hse.ru](mailto:rtveneboakh@edu.hse.ru);  
10 Contributing authors: [eadusarfo@edu.hse.ru](mailto:eadusarfo@edu.hse.ru);

# 11 Appendix A

## 12 A.1 Variable Definition and Source

- 13 1. Log bad water: The percentage of the population without access to a specific type of drinking water  
14 source at each 5x5 km pixel. Source: Institute for Health Metrics and Evaluation (IHME) [1].
- 15 2. Log open defecation and Log unimproved sanitation: Reliance on Open defecation and other Unim-  
16 proved Sanitation represents the percentage of the population without access to a specific type of  
17 sanitation facility at each 5x5 km pixel. Source: Institute for Health Metrics and Evaluation (IHME)  
18 [1].
- 19 3. Particulate Matter (PM2.5) Concentration: This represents the average concentration of fine particu-  
20 late matter (PM2.5) present in the ambient air. PM2.5 refers to particles suspended in the air with a  
21 diameter of 2.5 micrometers or smaller, which can pose health risks when inhaled due to their ability  
22 to penetrate deep into the respiratory system. This variable is of critical importance in understand-  
23 ing the impact of ambient air pollution on global health. Data is available from 1990 to 2013 and is  
24 sourced from Brauer et al. [2].
- 25 4. CO2: Represents the mean concentration of carbon dioxide (CO2) contained within a vertical column  
26 of dry air that extends from the Earth's surface up to the outer boundary of the atmosphere. This  
27 concentration measurement is typically expressed in parts per million (ppm) by volume. The data  
28 used for this variable are derived from NASA's Orbiting Carbon Observatory-2 (OCO-2) project.  
29 The provided raster dataset captures this CO2 concentration by utilizing a 10-kilometer grid. Source:  
30 OCO-2 Science Team/Michael Gunson, Annmarie Eldering [3].
- 31 5. Mineral deposits: Mineral Deposits in Africa pertains to the spatial distribution of mineral resource  
32 deposits across the African continent. These mineral deposits encompass 22 specific minerals or mineral  
33 commodities that are considered critical for the economic and security interests of the United States,  
34 as of the year 2017. The dataset consists of both point and polygon layers within a geodatabase from  
35 Schulz et al. [4].
- 36 6. Petroleum field: The Petroleum Dataset (PETRODATA) is a comprehensive collection of global oil  
37 and gas fields. This dataset is specifically curated to provide detailed information about the geographic  
38 distribution of hydrocarbon reserves around the world. It is tailored for utilization within geographic  
39 information systems (GIS), offering a specialized resource for visualization, manipulation, and in-depth  
40 analysis. Within this dataset, essential details about oil and gas fields are meticulously documented.  
41 The data is taken from Lujala et al. [5].
- 42 7. In-Migration: Estimated internal human migration flows between subnational administrative units  
43 for malaria-endemic countries. This data captures a 5year internal human migration flow (number  
44 of people) between 2005 and 2010. For each country, it also included a GHA\_AdminUnit\_Centroids

- 45 shapefile representing the subnational administrative units of origin and destination Source: World  
 46 Health Organization [6]
- 47 8. Violent Conflict Events: We make use of the Armed Conflict Location and Event dataset [7], which  
 48 provides data regarding the geographical locations of conflict incidents across African nations. These  
 49 incidents are sourced from a variety of outlets, such as regional and local news reports, humanitarian  
 50 organizations, and scholarly publications. One distinct aspect of ACLED is its inclusive documentation  
 51 of all forms of political violence, encompassing acts against civilians, riots, and protests both within  
 52 and beyond civil conflicts, without necessitating a minimum threshold for battle-related fatalities.  
 53 Additionally, ACLED provides insights into event categories, their outcomes, and the attributes of  
 54 involved parties on both opposing sides of the conflict.
- 55 9. Berman Mineral: The Raw Material Data (RMD) dataset primarily gathers data pertaining to large-  
 56 scale mines, typically managed by multinational corporations or governmental bodies. Consequently,  
 57 our sample does not encompass small-scale mines or those that operate outside the bounds of legality.  
 58 This data was borrowed from Berman et al. [8]
- 59 10. Mean elevation: Global elevation (in meters) from Shuttle Radar Topography Mission (SRTM) dataset  
 60 (v4.1) at 500m resolution.
- 61 11. Temperature: Average monthly air temperature per year in degrees Celsius. Created using UDel Air  
 62 Temperature dataset.
- 63 12. Precipitation: Total precipitation per year in millimeters. Created using UDel Precipitation dataset.

**Table A1** Summary Statistics of Baseline Variables

|                                          | Sample size | Mean     | Standard deviation | Minimum | Maximum  |
|------------------------------------------|-------------|----------|--------------------|---------|----------|
| Log bad water                            | 12529       | 4.752    | 3.732              | 0.000   | 12.425   |
| Log open defecation                      | 12529       | 5.133    | 3.686              | 0.000   | 12.009   |
| Log unimproved sanitation                | 12529       | 5.037    | 3.664              | 0.000   | 12.416   |
| Particulate Matter (PM2.5) Concentration | 12529       | 0.344    | 1.832              | 0.000   | 52.077   |
| CO2                                      | 12529       | 402.432  | 0.917              | 399.491 | 406.474  |
| Mineral deposits                         | 12529       | 0.095    | 0.587              | 0.000   | 17.000   |
| Petroleum field                          | 12529       | 0.166    | 0.541              | 0.000   | 5.000    |
| Latitude                                 | 12529       | 18.600   | 16.053             | -25.359 | 63.574   |
| Longitude                                | 12529       | 6.057    | 17.306             | -34.823 | 37.657   |
| Mean elevation                           | 12428       | 611.082  | 436.968            | -76.385 | 2843.352 |
| Temperature                              | 12360       | 24.026   | 3.468              | 8.864   | 30.234   |
| Precipitation                            | 12360       | 56.927   | 51.291             | 0.000   | 259.162  |
| Vegetation                               | 12529       | 3253.490 | 1883.494           | 71.344  | 7544.809 |
| Night luminosity                         | 12529       | 0.087    | 0.694              | 0.000   | 31.292   |
| Log distance to coast                    | 12529       | 12.650   | 2.094              | 0.000   | 14.403   |

## 64 A.2 Constructed 50km × 50km Africa grid cell

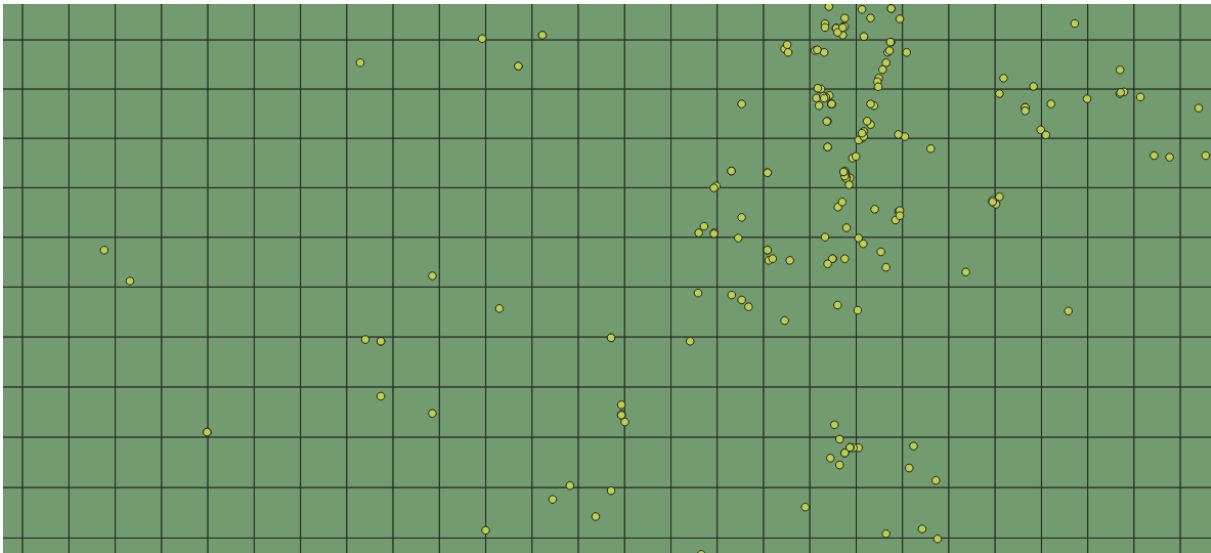

**Fig. A1** This figure shows a snapshot of our constructed 50km  $\times$  50km grid cell with the locations of mineral deposits from [4] plotted on it.

## 65 References

- 66 [1] Institute for Health Metrics and Evaluation (IHME).: Low- and Middle-Income Drinking Country  
 67 Water and Sanitation Facilities Access Geospatial Estimates 2000-2017. Institute for Health  
 68 Metrics and Evaluation (IHME). Available from: [http://ghdx.healthdata.org/record/ihme-data/  
 69 lmic-wash-access-geospatial-estimates-2000-2017](http://ghdx.healthdata.org/record/ihme-data/lmic-wash-access-geospatial-estimates-2000-2017).
- 70 [2] Brauer M, Freedman G, Frostad J, Van Donkelaar A, Martin R, Dentener F, et al. Ambient Air  
 71 Pollution Exposure Estimation for the Global Burden of Disease 2013. Environmental Science and  
 72 Technology. 2015;50(1):79–88. <https://doi.org/10.1021/es5053834>.
- 73 [3] OCO-2 Science Team/Michael Gunson, Annmarie Eldering.: OCO-2 Level 2 bias-corrected XCO<sub>2</sub> and  
 74 other select fields from the full-physics retrieval aggregated as daily files, Retrospective processing  
 75 V10r. Greenbelt, MD, USA. Accessed: 2021-07-20. Goddard Earth Sciences Data and Information  
 76 Services Center (GES DISC).
- 77 [4] Schulz KJ, DeYoung Jr JH, Seal II RR, Bradley DC. Critical mineral resources of the United States:  
 78 Economic and environmental geology and prospects for future supply. 1802. U.S. Geological Survey;  
 79 2017. Available from: <https://doi.org/10.3133/pp1802>.
- 80 [5] Lujala P, Rø d JK, Thieme N. Fighting over Oil: Introducing A New Dataset. Conflict Management  
 81 and Peace Science. 2007;24(3):239–256. <https://doi.org/10.1080/07388940701436469>.
- 82 [6] World Health Organization.: World malaria report. [https://apps.who.int/iris/bitstream/  
 83 handle/10665/200018/9789241565158\\_eng.pdf;jsessionid=ED89189FD617028F30DDF55459BF77C3?  
 84 sequence=1](https://apps.who.int/iris/bitstream/handle/10665/200018/9789241565158_eng.pdf;jsessionid=ED89189FD617028F30DDF55459BF77C3?sequence=1).

- 85 [7] Raleigh C, Linke A, Dowd C. Armed Conflict Location and Event Data Project (ACLED) Codebook  
86 Version 3. Oslo: Peace Research Institute Oslo; 2014. Available from: <http://www.acleddata.com/>  
87 [data/acled-versions-1-6-data-1997-2015/](http://www.acleddata.com/data/acled-versions-1-6-data-1997-2015/).
- 88 [8] Berman N, Couttenier M, Rohner D, Thoenig M. This mine is mine! How minerals fuel conflicts in  
89 Africa. *American Economic Review*. 2017;107(6):1564–1610.
